# Supplementary material for: Heart Failure Is a Risk Factor for Suffering and Dying of Clostridium difficile Infection. Results of a 15-Year Nationwide Study in Spain
Source: PubMed Central journal article supplement (PMC7141109; doi:10.3390/jcm9030614), 2020-02-25
Supplement: jcm-09-00614-s001.pdf [file jcm-09-00614-s001.pdf]

**Supplementary Table 1.** In-hospital mortality according to study variables of heart failure (HF) patients and matched non-HF controls with a diagnosis of *Clostridioides difficile* infection.

|                                            |           | IHM<br>HF           | IHM<br>Matched non HF | <i>p</i> |
|--------------------------------------------|-----------|---------------------|-----------------------|----------|
| Diagnosis position                         | Primary   | 270(18.39)          | 112(7.63)             | <0.001   |
|                                            | Secondary | 1125(21.12)         | 786(14.76)            | <0.001   |
| Year <i>N</i> (%)                          | 2001-05   | 256(21.69)          | 194(16.44)            | 0.001    |
|                                            | 2006-10   | 437(22.08)          | 275(13.9)             | <0.001   |
|                                            | 2011-15   | 702(19.31)          | 429(11.8)             | <0.001   |
| Sex. <i>N</i> (%)                          | Female    | 802(19.57)          | 526(12.84)            | <0.001   |
|                                            | Male      | 593(21.99)          | 372(13.79)            | <0.001   |
| Age in years. Mean (SD)                    |           | 81.91(8.88)         | 82.3(8.73)            | 0.356    |
| Age groups in years.                       | 40-64     | 59(13.59)           | 38(8.76)              | 0.024    |
| Mean (SD)                                  | 65-74     | 183(18.67)          | 101(10.31)            | <0.001   |
|                                            | 75-84     | 540(19.54)          | 350(12.66)            | <0.001   |
|                                            | ≥85       | 613(23.42)          | 409(15.63)            | <0.001   |
| CCI. Mean (SD)                             |           | 1.35(0.99)          | 1.3(1.01)             | 0.293    |
| CCI. <i>N</i> (%)                          | 0         | 265(18.33)          | 197(11.34)            | 0.014    |
|                                            | 1         | 596(22.1)           | 374(13.57)            | <0.001   |
|                                            | ≥2        | 534(20.14)          | 327(14.21)            | 0.015    |
| Hypercholesterolemia. <i>N</i> (%)         | Yes       | 149(13.69)          | 99(8.17)              | <0.001   |
| Parenteral antibiotic therapy <i>N</i> (%) | Yes       | 467(19.20)          | 425(18.02)            | 0.385    |
| Surgery <i>N</i> (%)                       | Yes       | 180(21.38)          | 177(19.67)            | 0.472    |
| Severity. <i>N</i> (%)                     | Yes       | 282(40.87)          | 235(32.24)            | <0.001   |
| Readmission <i>N</i> (%)                   | Yes       | 507(22.75)          | 294(14.45)            | 0.004    |
| ER admission. <i>N</i> (%)                 | Yes       | 1224(19.98)         | 772(12.86)            | <0.001   |
| LOHS. Median (IQR)                         | Yes       | 23(25)              | 22(26)                | 0.209    |
| Cost. Mean (SD)                            |           | 4740.4<br>(2244.77) | 4994.67 (3135.4)      | 0.494    |

The *p* value for the difference between patients with HF patients and matched controls was calculated with the bivariate conditional logistic regression model. CCI Charlson Comorbidity Index. ER Emergency room. LOHS Length of hospital stay. IHM In hospital mortality. SD Standard Deviation. IQR. Interquartile range. NA. Not applicable as this is a matching variable
